# Supplementary material
Source: PubMed Central journal article supplement (PMC4343143)
Supplement: pnas.1421748112.sapp.pdf [file pnas.1421748112.sapp.pdf]

## Supporting Information Corrected June 17, 2015

### Supplementary Tables

Table S1. Bacterial strains and plasmids used in this study.

| Strains                          | Relevant characteristic                                                                                                                                                                                                                                                                                                                   | Reference or source |
|----------------------------------|-------------------------------------------------------------------------------------------------------------------------------------------------------------------------------------------------------------------------------------------------------------------------------------------------------------------------------------------|---------------------|
| <i>Sinorhizobium meliloti</i>    |                                                                                                                                                                                                                                                                                                                                           |                     |
| 1021                             | Sm <sup>r</sup> derivative of 2011 ( <i>expR</i> <sup>-</sup> )                                                                                                                                                                                                                                                                           | (1)                 |
| 8530                             | 1021 <i>expR</i> <sup>+</sup> derivative; Sm <sup>r</sup>                                                                                                                                                                                                                                                                                 | (2)                 |
| <i>Rm9020</i>                    | 8530 <i>exoY</i> ::Tn5-132; Sm <sup>r</sup> Otc <sup>r</sup>                                                                                                                                                                                                                                                                              | (3)                 |
| 8530 $\Delta$ <i>expR</i>        | 8530 derivative with <i>expR</i> deletion                                                                                                                                                                                                                                                                                                 | (M.J. Soto)         |
| 8530 <i>sinI</i> :: <i>Km</i>    | 8530 derivative with a Km resistant cassette inserted in <i>sinI</i>                                                                                                                                                                                                                                                                      | (M.J. Soto)         |
| 2011mTn5STM.1.08.B12             | 2011 derivative with miniTn5 in <i>SMb20391</i> gene; Nm <sup>r</sup>                                                                                                                                                                                                                                                                     | (4)                 |
| 2011mTn5STM.4.13.E03             | 2011 derivative with miniTn5 in <i>SMb20391</i> and oriented <i>gus</i> fusion; Nm <sup>r</sup>                                                                                                                                                                                                                                           | (4)                 |
| 2011mTn5STM.4.03.E12             | 2011 derivative with miniTn5 in <i>SMb20460</i> gene; Nm <sup>r</sup>                                                                                                                                                                                                                                                                     | (4)                 |
| <i>SMb20391</i> :: <i>Nm</i>     | 8530 derivative with miniTn5 in <i>SMb20391</i> ; Str <sup>r</sup> Nm <sup>r</sup>                                                                                                                                                                                                                                                        | This work           |
| <i>SMb20391</i> :: <i>Nm-gus</i> | 8530 derivative with miniTn5 in <i>SMb20391</i> and oriented <i>gus</i> fusion; Sm <sup>r</sup> Nm <sup>r</sup>                                                                                                                                                                                                                           | This work           |
| <i>SMb20460</i> :: <i>Nm</i>     | 8530 derivative with miniTn5 in <i>SMb20460</i> ; Sm <sup>r</sup> Nm <sup>r</sup>                                                                                                                                                                                                                                                         | This work           |
| $\Delta$ <i>SMb20390</i>         | 8530 derivative with <i>SMb20390</i> deletion; Sm <sup>r</sup>                                                                                                                                                                                                                                                                            | This work           |
| <i>Agrobacterium tumefaciens</i> |                                                                                                                                                                                                                                                                                                                                           |                     |
| C58 LBA1010                      | C58 containing oncogenic pTiB6                                                                                                                                                                                                                                                                                                            | (5)                 |
| <i>Escherichia coli</i>          |                                                                                                                                                                                                                                                                                                                                           |                     |
| DH5 $\alpha$                     | <i>supE44</i> , $\Delta$ <i>lacU169</i> , $\Phi$ 80, <i>lacZ</i> $\Delta$ M1, <i>recA1</i> , <i>endA1</i> , <i>gyrA96</i> , <i>thi1</i> , <i>relA1</i> , <i>5hsdR171</i>                                                                                                                                                                  | (6)                 |
| One Shot® TOP10                  | (F <sup>-</sup> ) <i>mcrA</i> $\Delta$ ( <i>mrr-hsdRMS-mcrBC</i> ) $\Phi$ 80 <i>lacZ</i> $\Delta$ M15 $\Delta$ <i>lacX74</i> <i>recA1</i> <i>araD139</i> $\Delta$ ( <i>araleu</i> )7697 <i>galU</i> <i>galK</i> <i>rpsL</i> (Sm <sup>r</sup> ) <i>endA1</i> <i>nupG</i>                                                                   | Invitrogene         |
| $\beta$ 2163                     | (F <sup>-</sup> ) RP4-2-Tc::Mu <i>dapA</i> ::( <i>erm-pir</i> ) [Km <sup>r</sup> Em <sup>r</sup> ]                                                                                                                                                                                                                                        | (7)                 |
| S17.1                            | Tmp <sup>r</sup> , Sm <sup>r</sup> , Sp <sup>r</sup> ; <i>thi</i> , <i>pro</i> , <i>recA</i> , <i>hsdR</i> , <i>hsdM</i> , <i>Rp4Tc</i> ::Mu, <i>Km</i> ::Tn7                                                                                                                                                                             | (8)                 |
| BL21(DE3)                        | F <sup>-</sup> <i>ompT</i> <i>gal</i> <i>dcm</i> <i>lon</i> <i>hsdS</i> <sub>B</sub> (r <sub>B</sub> <sup>-</sup> m <sub>B</sub> <sup>-</sup> ) $\lambda$ (DE3 [ <i>lacI</i> <i>lacUV5</i> -T7 gene 1 <i>ind1</i> <i>sam7</i> <i>nin5</i> ])                                                                                              | Novagene            |
| OmniMAX™                         | [ <i>proAB</i> <i>lacIq</i> <i>lacZ</i> $\Delta$ M15 Tn10(Tc <sup>r</sup> ) $\Delta$ ( <i>ccdAB</i> )] <i>mcrA</i> $\Delta$ ( <i>mrr hsdRMS-mcrBC</i> ) $\Phi$ 80( <i>lacZ</i> ) $\Delta$ M15 $\Delta$ ( <i>lacZYA-argF</i> )U169 <i>endA1</i> <i>recA1</i> <i>supE44</i> <i>thi-1</i> <i>gyrA96</i> <i>relA1</i> <i>tonA</i> <i>panD</i> | Invitrogene         |
| Plasmids                         |                                                                                                                                                                                                                                                                                                                                           |                     |
| pJB3Tc19                         | Ap <sup>r</sup> , Tc <sup>r</sup> ; cloning vector, P <sub>lac</sub> promoter                                                                                                                                                                                                                                                             | (9)                 |

|                     |                                                                                                                                    |            |
|---------------------|------------------------------------------------------------------------------------------------------------------------------------|------------|
| pET28b+             | Km <sup>r</sup> expression vector, IPTG-inducible T7 promoter.                                                                     | Novagene   |
| pET28b::BgsA        | Expression vector encoding BgsA with a His <sub>6</sub> -tag in the N-terminus                                                     | This work  |
| pQE80L              | Medium-copy expression vector, IPTG-inducible T5 promoter, Ap <sup>r</sup> for N-terminus His <sub>6</sub> -tag fusions            | Qiagen     |
| pQE80L::C-BgsA      | Expression vector encoding the last 139 amino acids of BgsA with a His <sub>6</sub> -tag in the N-terminus                         | This work  |
| pET21::PA3353       | Expression vector encoding a His <sub>6</sub> -tag derivative of the PilZ domain protein PA3353 from <i>Pseudomonas aeruginosa</i> | (10)       |
| pJBpleD*            | Ap <sup>r</sup> , Tc <sup>r</sup> ; pJB3Tc19 derivative bearing a 1423 bp XbaI/EcoRI fragment containing <i>pleD</i> *             | (11)       |
| pJB9091             | Ap <sup>r</sup> , Tc <sup>r</sup> ; pJB3Tc19 derivative bearing a EcoRI fragment containing <i>Smb20390</i> and <i>Smb20391</i>    | This work  |
| pJBpleD*9091        | Ap <sup>r</sup> , Tc <sup>r</sup> ; pJB39091 derivative bearing a 1423 bp XbaI/EcoRI fragment containing <i>pleD</i> *             | This work  |
| pCR-XL-TOPO         | Km <sup>r</sup> ; cloning vector for PCR products                                                                                  | Invitrogen |
| pK18 <i>mobsacB</i> | Km <sup>r</sup> ; mobilizable suicide plasmid                                                                                      | (12)       |
| pK18Δ20390          | Km <sup>r</sup> ; pCR-XL-TOPO carrying the deleted version of the <i>Smb20390</i> gene                                             | This work  |

Ap<sup>r</sup>, Gm<sup>r</sup>, Km<sup>r</sup>, Nm<sup>r</sup>, Otc<sup>r</sup>, Sm<sup>r</sup>, Sp<sup>r</sup>, Tc<sup>r</sup>, Tmp<sup>r</sup>, stand for resistance to ampicillin, gentamicin, kanamycin, neomycin, oxytetracycline, streptomycin, spectinomycin, tetracycline and trimethoprim, respectively.

Table S2. Primers used in this work

| Primer      | Product | Sequence (5' to 3')             | Used in                     |
|-------------|---------|---------------------------------|-----------------------------|
| op90-F      | 496 bp  | 5'GTCCCATTTCTATCTCCCTCG3'       | Deletion of <i>Smb20390</i> |
| 20390L-R    |         | 5'GACGCGGATCGCCAGGAGGAGGATGCC3' |                             |
| 20390R-F    | 408 bp  | 5'TCCTGGCGATCCGCGTCACGCTCGCT3'  |                             |
| SM_b20391-R |         | 5'CGACGTAGCGGCTCATC3'           |                             |
| op90-F      | 3720 bp | 5'GTCCCATTTCTATCTCCCTCG3'       | Amplification of            |
| op91-R      |         | 5'CTCCCGCACGCTCTATGC3'          |                             |
| op91-F      | 2068 bp | 5'CATCGATAGGAGTTGCTTGTGGTTCAG   | Overexpression of           |
|             |         | TCTCTTCTAGC3'                   |                             |
| op91-R      |         | 5'CTCCCGCACGCTCTATGC3'          |                             |
| C-BgsA-F    | 488bp   | 5'GGATCCGCCTCGCTTATCTGCTTC3'    | Overexpression of           |
| C-BgsA-R    |         | 5'AAGCTTCCCGCACGCTCTATGC3'      |                             |
| SMb20390-F  | 144 bp  | 5'GGGATATTCCTCGTCGG3'           | qRT-PCR                     |
| SMb20390-R  |         | 5'GGCTATCTGCTGGTCCG3'           |                             |
| SMb20391-F  | 150 bp  | 5'TGCGTTACATGCTCTGGC3'          | qRT-PCR                     |
| SMb20391-R  |         | 5'CGACGTAGCGGCTCATC3'           |                             |

## Supplementary Figures

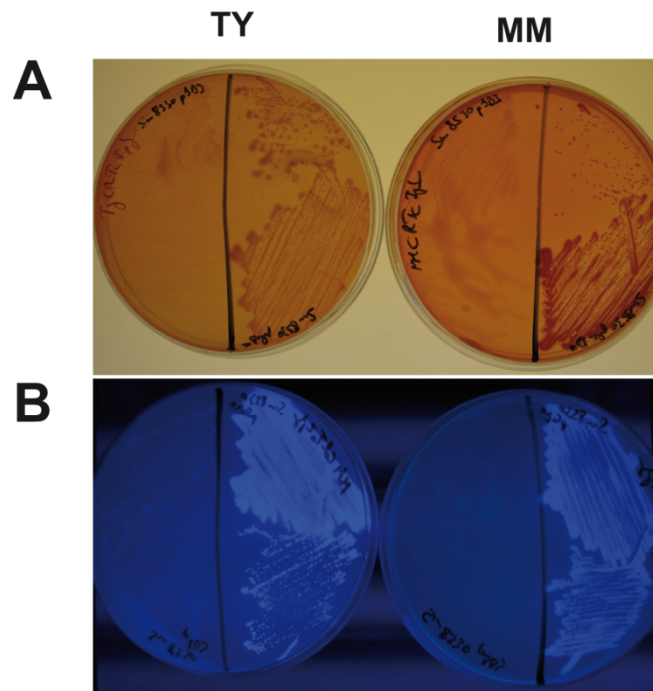

**Figure S1.** Influence of *pleD\** on bacterial staining with different dyes.

*S. meliloti* 8530 carrying pJB*pleD\** plasmid (right side of plates) or the vector pJB3Tc19 (left side of plates), grown on rich TY or minimal (MM) medium. A, Media supplemented with Congo Red; B, Media supplemented with Calcofluor. Cultures were imaged under white (A) or UV light (B) after growth at 28°C for 3 days.

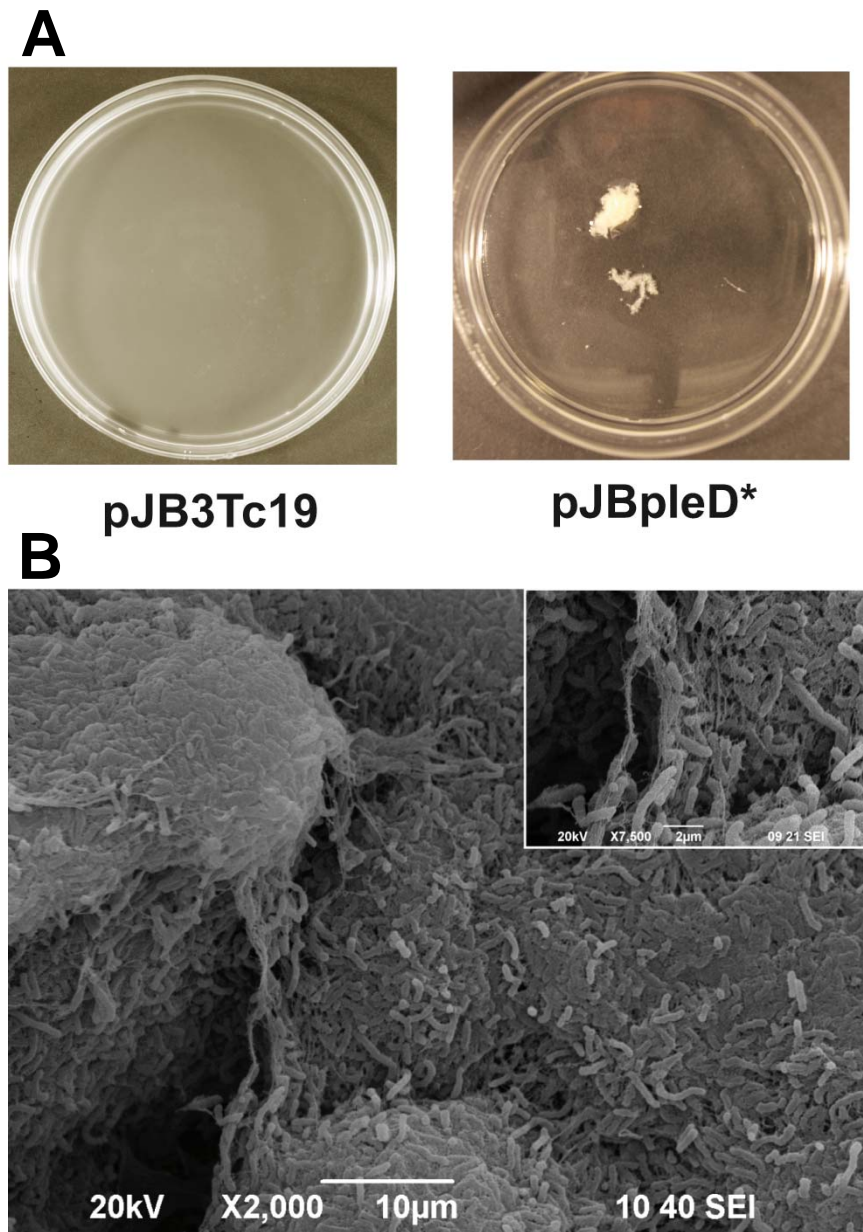

**Figure S2.** Elevated c-di-GMP levels in *Sme* promote flocculation in liquid cultures. (A) Floccs produced by *Sinorhizobium meliloti* 8530 expressing *pleD\** (pJBpleD\*) after growth for 1 week at 28°C with shaking in liquid MM in plates, in contrast to the control strain (*Sme* pJB3Tc19). (B) Scanning electron microscopy (SEM) images at  $\times 2,000$  and  $\times 7,500$  magnification (inset) of a flocc formed by *Sinorhizobium meliloti* 8530 expressing *pleD\** (pJBpleD\*). The images reveal details of the mesh of entangled filaments formed by *Sme* with high c-di-GMP levels.

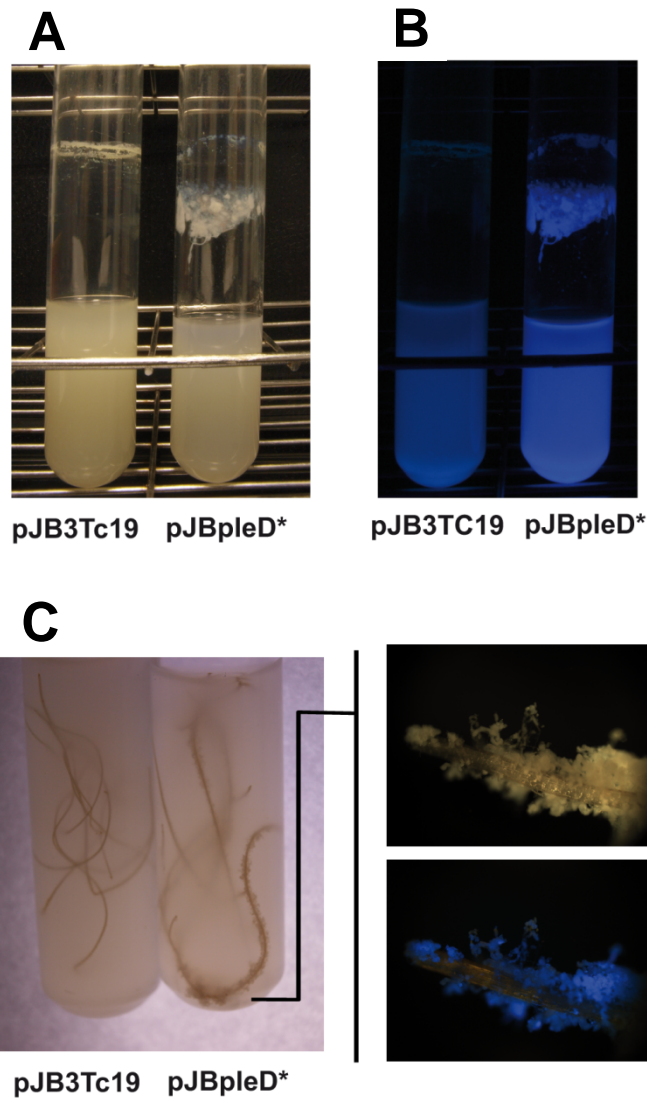

**Figure S3.** Elevated c-di-GMP levels in *Sme* promote biofilm formation and attachment to abiotic and biotic surfaces. (A and B) Biofilm formed by *Sinorhizobium meliloti* 8530 (pJBpleD\*) after growth with shaking for 3 days at 28°C in glass tubes with liquid MM media supplemented with CF (100µM) under white (A) and UV illumination (B). (C) Biofilm formation of *Sme* 8530 (pJBpleD\*) on alfalfa root surface. Bacteria were grown at 28°C for 3 days in glass tubes with liquid MM media supplemented with CF (100 µM) in the presence of *Medicago sativa* roots. Images of the biofilm formed by *Sme* pJBpleD\* over the roots were taken with a stereomicroscope under white- and UV-light.

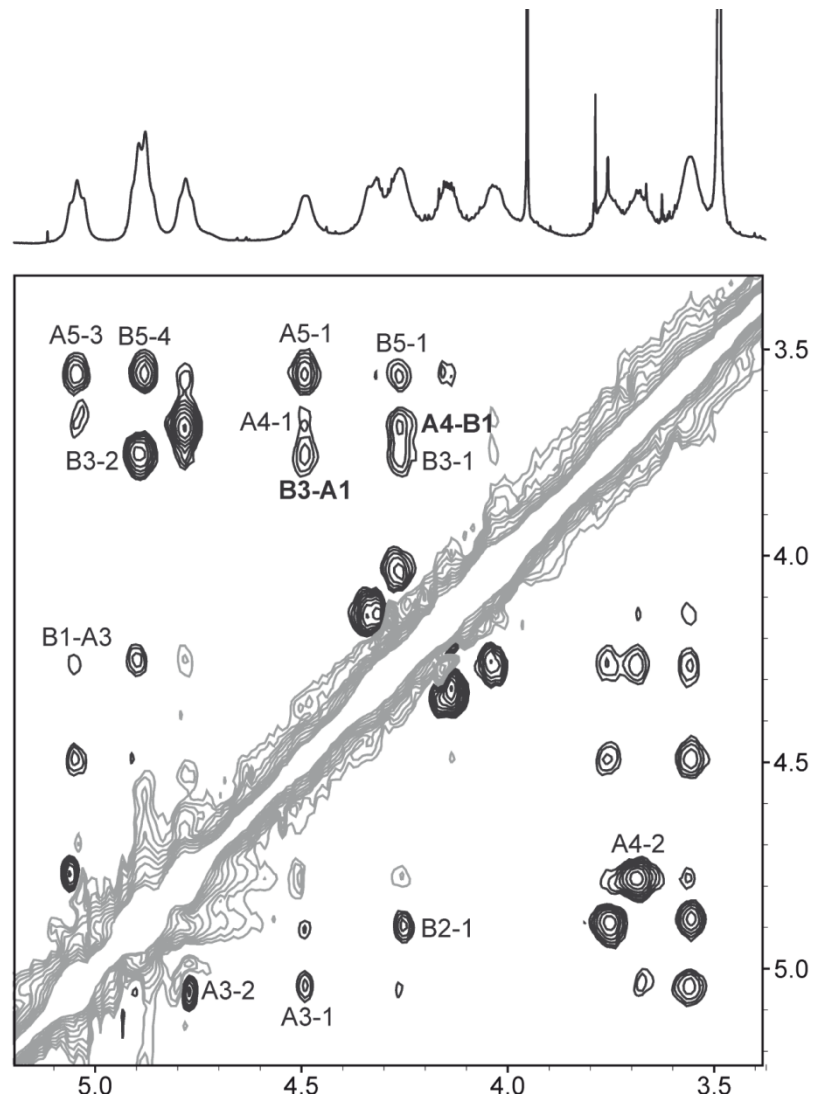

**Figure S4.** 500 MHz ROESY (mixing time 100 ms) of the acetylated mixed-linkage  $\beta$ -Glucan (MLG) purified from *Sinorhizobium meliloti* 8530 overexpressing *pleD\** (*Sme* pJBpleD\*). Inter-residue cross-peaks are indicated in bold.

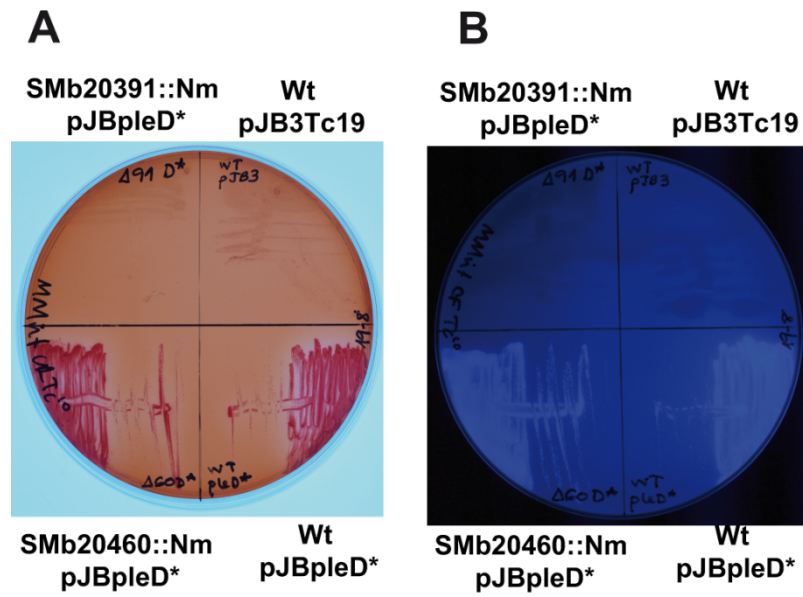

**Figure S5.** Influence of gene mutations on *S. meliloti* staining with different dyes. Appearances of *S. meliloti* 8530 (Wt) and *SMb20391* and *SMb20460* mutant strains expressing *pleD\** (pJBpleD\*). Cultures were imaged after growth at 28°C for 3 days in solid MM media supplemented with (A) Congo Red or (B) Calcofluor (UV light).



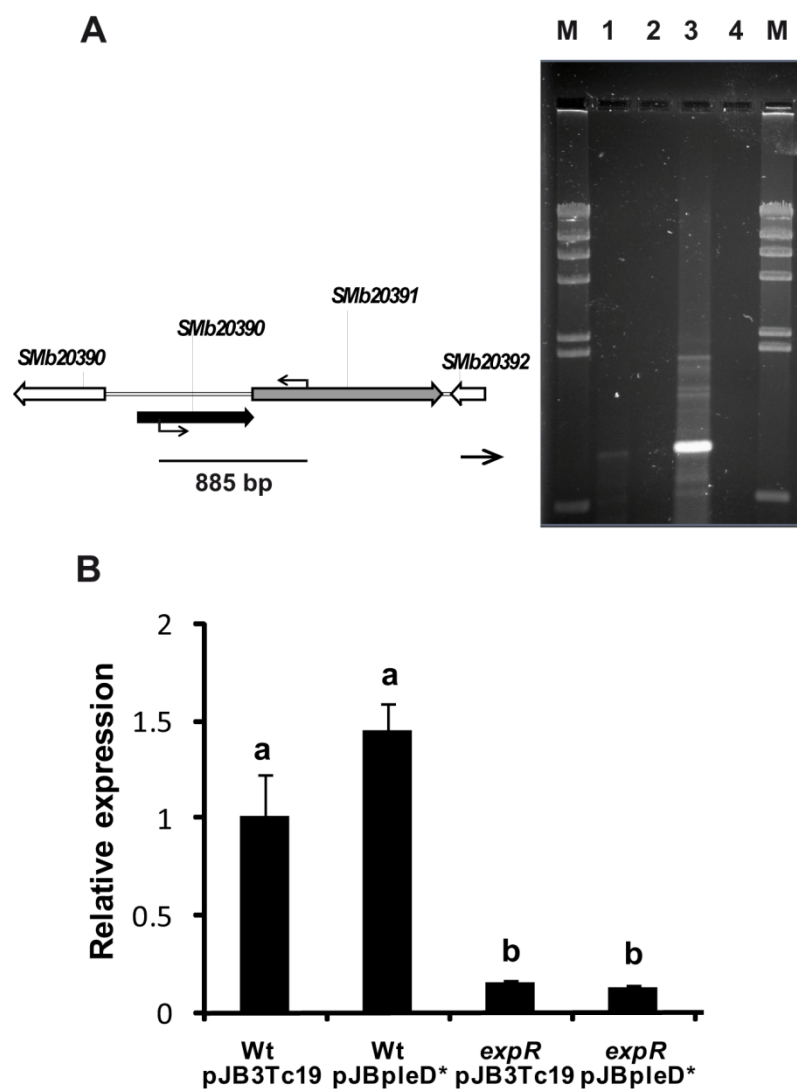

**Figure S6.** Transcription of the *Sinorhizobium meliloti* *Smb20390-91* operon.

(A) Cotranscription of *Smb20390* and *Smb20391* genes: M, Molecular ladder ( $\lambda$  HindIII); Reverse-Transcriptase (RT) PCR amplification of the depicted 885 bp fragment using *Sme* 8530 RNA carried out with (lane 1) or without (lane 2) the RT enzyme. Genomic DNA of *Sme* 8530 strain was used as positive control (lane 3) and MiliQ water as a blank (lane 4). (B) Relative transcript levels of *Smb20391* gene in *Sme* 8530 (wt) and a *expR* mutant derivative, in presence (pJBpleD\*) or absence of *pleD\** (pJB3Tc19). Error bars represent standard deviation; a and b denote analysis of variance categories for significant differences ( $P < 0.05$ ).

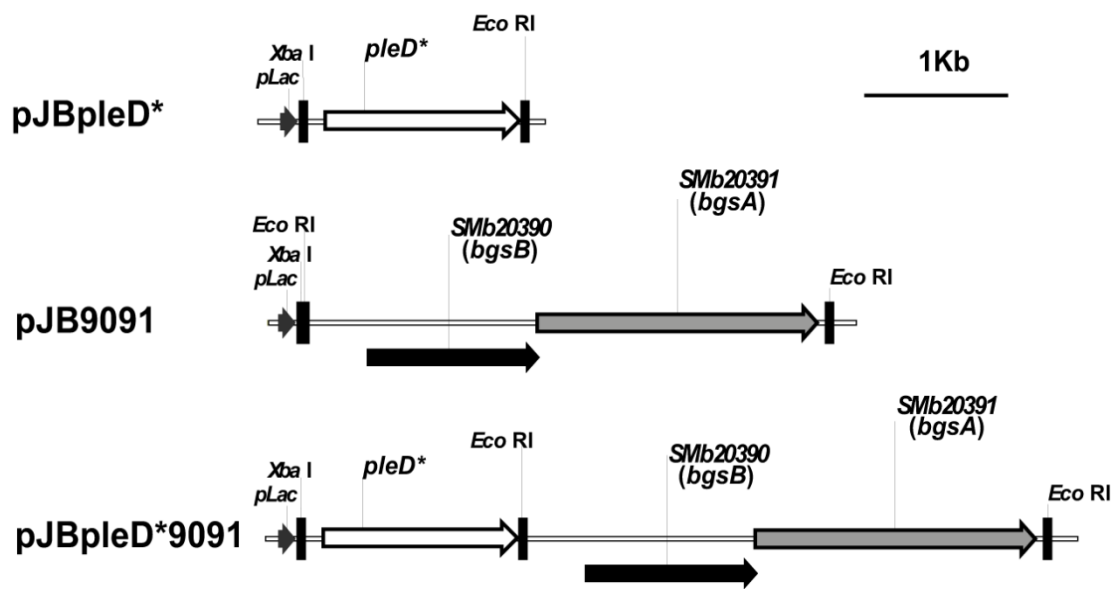

**Figure S7.** Diagram of various plasmid constructions.

Genes *pleD\**, *SMb20390* and *SMb20391* are indicated as white, black and gray arrows, respectively. Relevant restriction sites and other plasmid features are depicted.

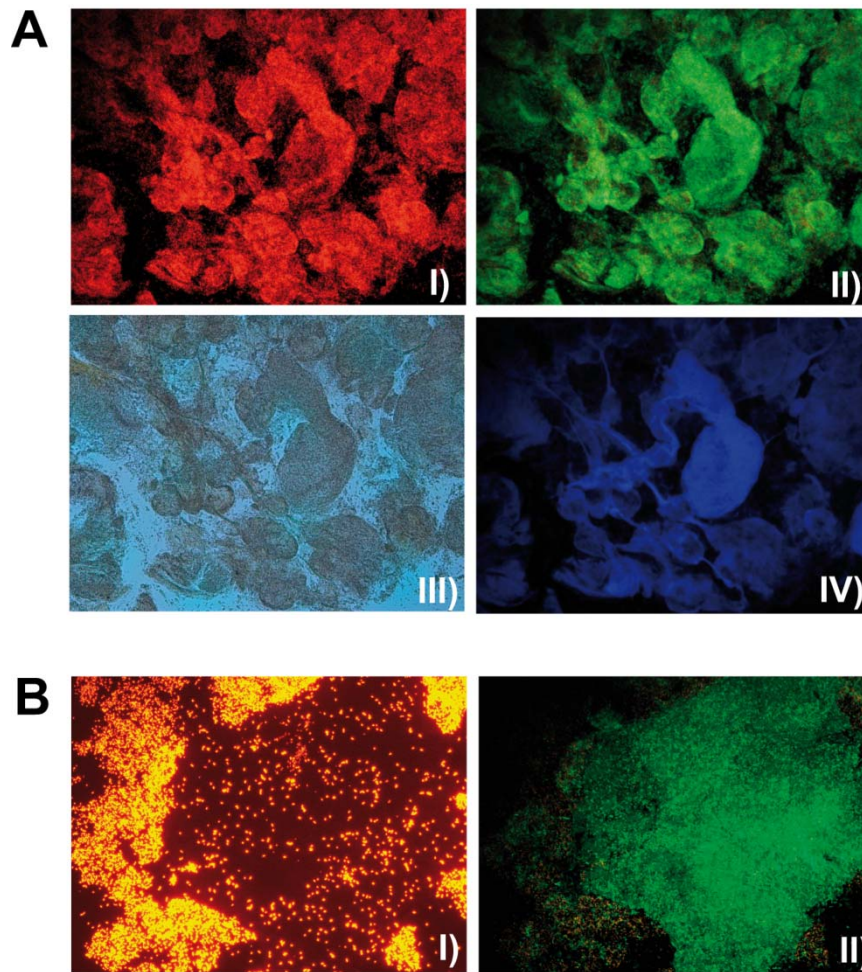

**Figure S8.** Epifluorescence micrographs at  $\times 10$  magnification of bacterial flocs. A, floc formed in flasks inoculated with 1:1 mixtures of 8530-GFP and 8530-dsRed, both overexpressing PleD\*; B, floc formed in flasks inoculated with similar numbers of 8530-GFP and *Smb20391*-dsRed, both overexpressing PleD\*; Filters: I, dsRed (G-2A); II, GFP (B-2A); IV, Calcofluor (CF; UV-2E/C); III, no filter.

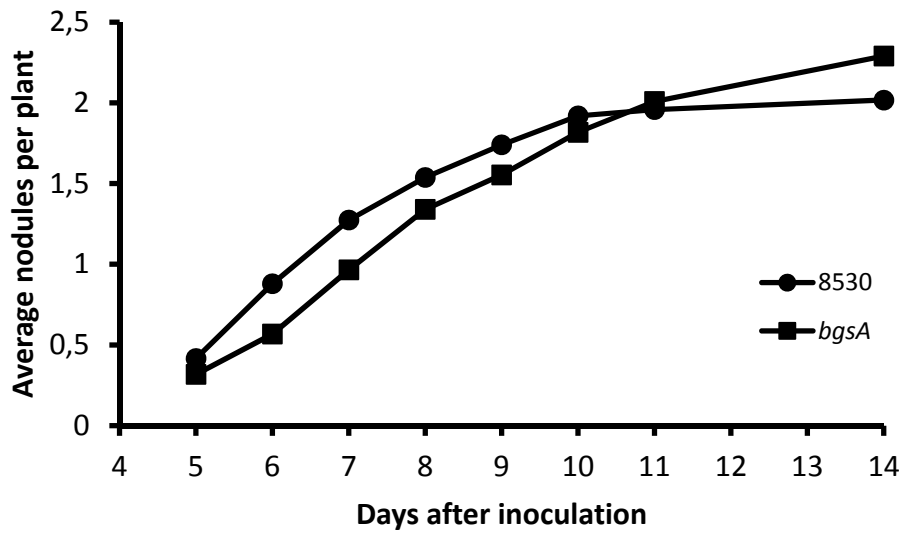

**Figure S9.** Nodulation kinetics of wild type 8530 and *Smb20391::Nm* mutant (*bgsA*), inoculated at  $10^3$  cells per root. Values are the means from 45 inoculated alfalfa plants and two independent experiments.

## Supplementary Methods

### *Intracellular c-di-GMP measurements*

c-di-GMP was extracted using a protocol based on a previous report (13). Three biological replicates of *Sinorhizobium meliloti* 8530 (*Sme*) expressing *pleD\** (pJBpleD\*) and its control *Sme* (pJB3Tc19), were grown in 10 ml of TY with shaking at 28°C for 24h. Formaldehyde at a final concentration of 0.19 % was added and the cells harvested by centrifugation (10 min at 4000 rpm). The pellet was washed in 1 ml of iced deionised water, centrifuged for 3 min at 13000 rpm, resuspended in 0.5 ml of iced deionised water and heated to 95°C for 5 min. A volume of 925 µl of iced absolute ethanol was added to reach a final concentration of 65%. Nucleotides were extracted by 30 sec of vortex followed by a centrifugation step (3 min at 13000 rpm). Supernatants containing extracted nucleotides were then evaporated to dryness at 50 °C in a speed-vacuum system. The pellet was resuspended by vigorous vortexing in 300 µl of AcNH<sub>4</sub> 10mM (pH 5,5). Samples were filtered through 0.45 µm GHP membranes (GHP Acrodisc, PALL). Samples were spiked at a concentration of 250 nM by mixing 100 µl of a solution of 750 nM of synthetic c-di-GMP (Axxora) dissolved in AcNH<sub>4</sub> 10mM pH 5,5 with 200 µl of each sample. Samples were analysed by reversed phase-coupled HPLC-MS/MS. High performance liquid chromatography was performed on an Agilent 1100 coupled to a 3x125 mm column Waters Spherisorb 5 µm ODS2 (C-18). Running conditions were optimized using synthetic c-di-GMP as a reference. ESI-MS mass spectra were measured on an Esquire 6000 (Bruker Daltonics) and on a TSQ7000 (Finnigan) mass spectrometer. Matrix-assisted laser desorption ionization spectra were measured on a Reflex III spectrometer (Bruker Daltonics). To confirm the identity of the substance, relevant peaks were fragmented by ESI-MS using the positive ion mode. Three major ions were visible in the c-di-GMP fragmentation pattern, and m/z 152 and

540 corresponded to products from single bond fragmentation, and 248 originated from double bond fragmentations. The area of the ion  $m/z$  540 peak was used to estimate the amount of c-di-GMP in each sample (similar values were obtained with the other ions). For quantification, a standard curve was established using synthetic c-di-GMP (Axxora) dissolved in ammonium acetate (10mM pH 5.5) at a range of concentrations (20 nM, 200 nM, 2  $\mu$ M and 20  $\mu$ M). After subtracting the basal 250nM spike, c-di-GMP concentrations in each strain culture were standardised with the total protein content, determined by Bradford assay (14).

#### *Microscopy studies of flocs formed by Sinorhizobium meliloti*

The flocs formed by *Sinorhizobium meliloti* strains expressing *pleD\** in liquid MM were analyzed by epifluorescence and scanning microscopy. For the epifluorescence microscopy two different fluorescent constructions (pBBR-gfp and pBBR-dsRed) were introduced into *Sinorhizobium meliloti* strains. Equal number of cells (from starting cultures) of the two strains to be compared (WT-GFP versus WT-DsRed or WT-GFP versus *SMB20391*-DsRed) expressing *pleD\** (pJBpleD\*) were inoculated in flasks with 10 ml of liquid MM supplemented with Tc and CF and grown with shaking for 2 days at 28°C. The flocs formed were analysed using a epifluorescence microscope (Nikon eclipse 50i). Filters for Calcofluor (CF; UV-2E/C Ex/Em 358/461nm) and for fluorescent proteins GFP (B-2A Ex/Em 480/506nm) and DsRed (G-2A Ex/Em 558/583nm) were used.

For scanning microscopy flocs formed by untagged *Sinorhizobium meliloti* 8530 (*Sme*) expressing *pleD\** (pJBpleD\*) grown in MM with shaking for 2 days at 28°C were fixed in 2.5% glutaraldehyde in 0.1M cacodylate buffer pH7.2, dehydrated in ethanol series and taken to the critical point (Baltec CPD030). Samples were then mounted on

stainless steel stubs, covered with gold in a Leica SCD050 and examined in a Jeol Scanning Electron Microscope (JSM-6490LV).

### *Flocculation and Biofilm assays*

Starting cultures of rhizobial strains were prepared as above. Floccs were obtained by growing *Sinorhizobium meliloti* 8530 expressing *pleD\** (pJBpleD\*) for 2-7 days in Petri dishes at 28°C in liquid MM supplemented with tetracycline (10 µg/ml) with gentle shaking.

For biofilm assays, 6 ml of diluted cultures in MM supplemented with CF (100µM final concentration) were disposed in glass tubes and let grow with shaking at 28°C for 72 h.

For adhesion to biotic surfaces, bacteria were incubated in the presence of surface sterilized alfalfa roots. Roots were imaged using a fluorescent stereo microscope (Leica M165 FC). Biofilm quantification was done in 96-well plates by crystal violet staining as previously described (5).

### **Supplementary References**

1. Meade HM, Long SR, Ruvkun GB, Brown SE, & Ausubel FM (1982) Physical and genetic characterization of symbiotic and auxotrophic mutants of *Rhizobium meliloti* induced by transposon Tn5 mutagenesis. *J.Bacteriol.* 149(1):114-122.
2. Glazebrook J & Walker GC (1989) A novel exopolysaccharide can function in place of the calcofluor-binding exopolysaccharide in nodulation of alfalfa by *Rhizobium meliloti*. *Cell* 56(4):661-672.
3. Glazebrook J & Walker GC (1991) Genetic techniques in *Rhizobium meliloti*. *Methods in Enzymology Bacterial Genetic Systems*, ed Jeffrey HM (Academic Press), Volume 204 Ed, pp 398-418.
4. Pobigaylo N, *et al.* (2006) Construction of a large signature-tagged mini-Tn5 transposon library and its application to mutagenesis of *Sinorhizobium meliloti*. *Appl.Environ.Microbiol.* 72(6):4329-4337.
5. Koekman BP, Hooykaas PJ, & Schilperoort RA (1982) A functional map of the replicator region of the octopine Ti plasmid. *Plasmid* 7(2):119-132.
6. Hanahan D (1983) Studies on transformation of *Escherichia coli* with Plasmids. *J. Mol. Biol.* 166(4):557-580.
7. Demarre G, *et al.* (2005) A new family of mobilizable suicide plasmids based on broad host range R388 plasmid (IncW) and RP4 plasmid (IncPalpha)

- conjugative machineries and their cognate *Escherichia coli* host strains. *Res.Microbiol.* 156(2):245-255.
8. Simon R, Prierer U, & Pühler A (1983) A Broad Host Range Mobilization System for *In vivo* Genetic-Engineering-Transposon Mutagenesis in Gram-Negative Bacteria. *Biotechnology* 1(9):784-791.
  9. Blatny JM, Brautaset T, Winther-Larsen HC, Haugan K, Valla S (1997) Construction and use of a versatile set of broad-host-range cloning and expression vectors based on the RK2 replicon. *Appl Environ Microbiol* 63: 370-9.
  10. Düvel J, *et al.* (2012) A chemical proteomics approach to identify c-di-GMP binding proteins in *Pseudomonas aeruginosa*. *J.Microbiol.Methods* 88(2):229-236.
  11. Pérez-Mendoza D, *et al.* (2014) Responses to elevated c-di-GMP levels in mutualistic and pathogenic plant-interacting bacteria. *PLoS.One.* 9(3):e91645.
  12. Schäfer A, *et al.* (1994) Small mobilizable multi-purpose cloning vectors derived from the *Escherichia coli* plasmids pK18 and pK19: selection of defined deletions in the chromosome of *Corynebacterium glutamicum*. *Gene* 145(1):69-73.
  13. Amikam D, Steinberger O, Shkolnik T, & Ben-Ishai Z (1995) The novel cyclic dinucleotide 3'-5' cyclic diguanylic acid binds to p21ras and enhances DNA synthesis but not cell replication in the Molt 4 cell line. *Biochem.J* 311 ( Pt 3):921-927.
  14. Bradford MM (1976) A rapid and sensitive method for the quantitation of microgram quantities of protein utilizing the principle of protein-dye binding. *Anal.Biochem.* 72:248-254.
